# Supplementary material
Source: publisher figshare collection journal article supplement (https://karger.figshare.com/ndownloader/files/26141162)
Supplement: Supplementary file 1 [file 26141162]

**Supplementary Legends**

**Supplementary figure 1: Should Sars-Cov-2 positive health care workers keep on working** HCW were asked, if they think Sars-CoV-2 positive HCW should keep on working. Ranked from 0 (disagree) to 10 (totally disagree).

**Supplementary figure 2: Perception of safety at work**  Current feeling of safety at work ranked from 0 (low safety) to 10 (high safety).

**Supplementary figure 3: Perception of personel protective equipment**  HCW were asked, if they have the feeling that the hospital provides enough personnel protective equipment. Ranked from 0 (not applicable) to 10 (applicable).

**Supplementary figure 4: Perception of social exclusion**  Health care workers were asked, if they have the feeling that family or friends avoid contact to them due to their work. Ranked from 0 (not applicable) to 10 (highly applicable)

**Supplementary figure 5: Source of information** HCW were asked to indicate their preferred source of information regarding the pandemic: Internet, television, hospital, newspaper, radio, scientific web pages, social media, friends

**Supplementary figure 6: Perception of information provided by the hospital** Current level of information provided by the hospital is ranked from 0 (not informed sufficiently) to 10 (well informed)
